# Supplementary material for: Protocol for the development of a core outcome set for studies of pregnant women with pre-existing multimorbidity
Source: PubMed Central journal article supplement (PMC8559099; doi:10.1136/bmjopen-2020-044919), 2021-10-29
Supplement: bmjopen-2020-044919supp001.pdf [file bmjopen-2020-044919supp001.pdf]

| <b>Appendix 1: The Core Outcome Set-STANDARDISED Protocol Items (COS-STAP) Statement</b> |           |                                                                                                                                                                         |                               |
|------------------------------------------------------------------------------------------|-----------|-------------------------------------------------------------------------------------------------------------------------------------------------------------------------|-------------------------------|
| <b>Sections</b>                                                                          | <b>No</b> | <b>Items</b>                                                                                                                                                            | <b>Location in manuscript</b> |
| TITLE/ABSTRACT                                                                           |           |                                                                                                                                                                         |                               |
| Title                                                                                    | 1a        | Identify in the title that the paper describes the protocol for the planned development of a COS                                                                        | page 1 Title page             |
| Abstract                                                                                 | 1b        | Provide a structured abstract                                                                                                                                           | page 2 Abstract               |
| INTRODUCTION                                                                             |           |                                                                                                                                                                         |                               |
| Background and objectives                                                                | 2a        | Describe the background and explain the rationale for developing the COS, and identify the reasons why a COS is needed and the potential barriers to its implementation | page 4 Background             |
|                                                                                          | 2b        | Describe the specific objectives with reference to developing a COS                                                                                                     | page 4 Background             |
| Scope                                                                                    | 3a        | Describe the health condition(s) and population(s) that will be covered by the COS                                                                                      | Page 5: Scope of the COS      |
|                                                                                          | 3b        | Describe the intervention(s) that will be covered by the COS                                                                                                            | Page 5: Scope of the COS      |
|                                                                                          | 3c        | Describe the context of use for which the COS is to be applied                                                                                                          | Page 5: Scope of the COS      |
| METHODS                                                                                  |           |                                                                                                                                                                         |                               |
| Stakeholders                                                                             | 4         | Describe the stakeholder groups to be involved in the COS development process, the nature of and rationale for their involvement and also how the                       | Table 1 and Table 2           |

|                                  |    |                                                                                                                                                  |                                                                              |
|----------------------------------|----|--------------------------------------------------------------------------------------------------------------------------------------------------|------------------------------------------------------------------------------|
|                                  |    | individuals will be identified; this should cover involvement both as members of the research team and as participants in the study              |                                                                              |
| Information sources              | 5a | Describe the information sources that will be used to identify the list of outcomes. Outline the methods or reference other protocols/papers     | Page 5: Stage 1 Systematic literature search<br>Page 6: Stage 2 Focus groups |
|                                  | 5b | Describe how outcomes may be dropped/combined, with reasons                                                                                      | Page 8: Initial list of outcomes                                             |
| Consensus process                | 6  | Describe the plans for how the consensus process will be undertaken                                                                              | Page 11: Consensus meeting                                                   |
| Consensus definition             | 7a | Describe the consensus definition                                                                                                                | Page 10: Score criteria for consensus                                        |
|                                  | 7b | Describe the procedure for determining how outcomes will be added/combined/dropped from consideration during the consensus process               | Page 10: Score criteria for consensus                                        |
| ANALYSIS                         |    |                                                                                                                                                  |                                                                              |
| Outcome scoring/feedback         | 8  | Describe how outcomes will be scored and summarised, describe how participants will receive feedback during the consensus process                | Page 10: 1 <sup>st</sup> -3 <sup>rd</sup> Delphi survey                      |
| Missing data                     | 9  | Describe how missing data will be handled during the consensus process                                                                           | Page 10: 3 <sup>rd</sup> Delphi survey                                       |
| ETHICS and DISSEMINATION         |    |                                                                                                                                                  |                                                                              |
| Ethics approval/informed consent | 10 | Describe any plans for obtaining research ethics committee/institutional review board approval in relation to the consensus process and describe | Page 6: Focus group<br>Page 8: 1 <sup>st</sup> Delphi<br>Page 12: Ethics     |

|                            |    |                                                                                                                                     |                               |
|----------------------------|----|-------------------------------------------------------------------------------------------------------------------------------------|-------------------------------|
|                            |    | how informed consent will be obtained (if relevant)                                                                                 |                               |
| Dissemination              | 11 | Describe any plans to communicate the results to study participants and COS users, inclusive of methods and timing of dissemination | Page 12: Dissemination        |
| ADMINISTRATIVE INFORMATION |    |                                                                                                                                     |                               |
| Funders                    | 12 | Describe sources of funding, role of funders                                                                                        | Page 12: Funding statement    |
| Conflicts of interest      | 13 | Describe any potential conflicts of interest within the study team and how they will be managed                                     | Page 12: Conflict of interest |
